# Supplementary material for: ACT for Life: Why Psychiatrists Pound the Pavement to Provide Care
Source: Atypon-hosted journal article supplement (doi:10.1176/appi.ps.201900619), 2021-05-07
Supplement: appi.ps.201900619.ds001.pdf [file appi.ps.201900619.ds001.pdf]

| <b>ACT TEAM / PROVIDER CHARACTERISTICS</b>                                                                                                                 |                                                         |                                                      |                                                    |                                              |                                              |                                                     |                                              |                         |  |
|------------------------------------------------------------------------------------------------------------------------------------------------------------|---------------------------------------------------------|------------------------------------------------------|----------------------------------------------------|----------------------------------------------|----------------------------------------------|-----------------------------------------------------|----------------------------------------------|-------------------------|--|
| How long have/had you worked in Assertive Community Treatment (ACT) settings?                                                                              | <b>&lt;2 years</b><br>20% (11)                          | <b>2-4 years</b><br>13% (7)                          | <b>4-6 years</b><br>17% (9)                        | <b>6-10 years</b><br>15% (8)                 | <b>&gt;10 years</b><br>35% (19)              |                                                     |                                              |                         |  |
| Provider full time equivalents (hours)                                                                                                                     | <b>&lt;0.375 (&lt;15)</b>                               | <b>0.375-0.7 (15-28)</b>                             | <b>&gt;0.7 (&gt;28)</b>                            | <b>&gt;=1.0 (&gt;=40)</b>                    |                                              |                                                     |                                              |                         |  |
| What is/was your time commitment on an ACT team? Please provide an answer in terms of full time equivalents (FTE; i.e. 1.0, 0.68, etc.)                    | 20% (11)                                                | 40% (22)                                             | 40% (22)                                           | 10% (18)                                     |                                              |                                                     |                                              |                         |  |
| What is/was the total amount of psychiatry on your ACT team? Please provide an answer in terms of FTE (i.e. 1.0, 0.68, etc.)                               | 4% (2)                                                  | 40% (22)                                             | 56% (31)                                           | 33% (18)                                     |                                              |                                                     |                                              |                         |  |
| In which state was your ACT team?                                                                                                                          | <b>West</b><br>16% (9)                                  | <b>Midwest</b><br>18% (10)                           | <b>South</b><br>13% (7)                            | <b>Northeast</b><br>51% (28)                 | <b>Canada</b><br>2% (1)                      |                                                     |                                              |                         |  |
| Describe your ACT team's catchment area                                                                                                                    | <b>Urban &gt;1M</b><br>40% (22)                         | <b>Urban 500k-999k</b><br>20% (11)                   | <b>Urban &lt;500k</b><br>18% (10)                  | <b>Suburban</b><br>5% (3)                    | <b>Rural</b><br>15% (8)                      | <b>Other</b><br>2% (1)                              |                                              |                         |  |
| Which of the following applies to your ACT team? (affiliated with:)                                                                                        | <b>Hospital</b><br>13% (7)                              | <b>Not-for-profit</b><br>67% (37)                    | <b>State/county/city</b><br>13% (7)                | <b>Other</b><br>7% (4)                       |                                              |                                                     |                                              |                         |  |
| Indicate your ACT team's referral source(s): (check all that apply)                                                                                        | <b>Acute inpatient</b><br>85% (47)                      | <b>Long-term inpatient</b><br>69% (38)               | <b>Jail/prison</b><br>60% (33)                     | <b>Outpatient</b><br>76% (42)                | <b>Shelter/homeless outreach</b><br>67% (37) | <b>Other</b><br>20% (11)                            |                                              |                         |  |
| Does your ACT team's state issue court-mandated treatment orders (e.g. assisted outpatient treatment)?                                                     | <b>Yes</b><br>75% (41)                                  | <b>No</b><br>25% (14)                                |                                                    |                                              |                                              |                                                     |                                              |                         |  |
| <b>ACT PSYCHIATRIST DUTIES</b>                                                                                                                             |                                                         |                                                      |                                                    |                                              |                                              |                                                     |                                              |                         |  |
| Do/ did you see patients primarily:                                                                                                                        | <b>In the field</b><br>64% (35)                         | <b>In the office</b><br>31% (17)                     | <b>Via telepsychiatry</b><br>0% (0)                | <b>Other</b><br>5% (3)                       |                                              |                                                     |                                              |                         |  |
| Do/ did you schedule your own visits / route?                                                                                                              | <b>Yes</b><br>70% (38)                                  | <b>No</b><br>30% (16)                                |                                                    |                                              |                                              |                                                     |                                              |                         |  |
| If you make/ made home visits, please describe your mode of transportation (check all that apply)                                                          | <b>Personal vehicle</b><br>67% (36)                     | <b>Agency vehicle</b><br>33% (18)                    | <b>Public transport</b><br>28% (15)                | <b>Bicycle</b><br>6% (3)                     | <b>Walking</b><br>33% (18)                   | <b>Other</b><br>7% (4)                              |                                              |                         |  |
| How many team members generally travel(led) with you on home visits?                                                                                       | <b>None</b><br>70% (38)                                 | <b>One</b><br>28% (15)                               | <b>Two or more</b><br>0% (0)                       | <b>Only students</b><br>2% (1)               | <b>No home visits</b><br>0% (0)              |                                                     |                                              |                         |  |
| How do/ did you complete your visit notes?                                                                                                                 | <b>Mobile device at time of visit</b><br>13% (7)        | <b>Mobile device at home</b><br>25% (14)             | <b>Office computer</b><br>75% (41)                 | <b>Paper charting</b><br>11% (6)             | <b>Other</b><br>7% (4)                       |                                                     |                                              |                         |  |
| On your ACT Team, what clinical responsibilities do/ did you have in addition to psychiatric evaluations and medication management? (check all that apply) | <b>Administering injectable medications</b><br>52% (28) | <b>Primary care/ physical examination</b><br>17% (9) | <b>Entitlements supports</b><br>43% (23)           | <b>Prior authorizations</b><br>63% (34)      | <b>Teaching and supervision</b><br>76% (41)  | <b>Other</b><br>26% (14)                            |                                              |                         |  |
| What support do/ did you provide when you are not "on duty"? (check all that apply)                                                                        | <b>Return team member calls/ email</b><br>93% (51)      | <b>Return patient calls</b><br>38% (21)              | <b>Return hospital/ external calls</b><br>75% (41) | <b>Catch up on documentation</b><br>76% (42) | <b>Prescription management</b><br>82% (45)   | <b>Coordinate team visits and tasks</b><br>22% (12) | <b>No support when not on duty</b><br>2% (1) | <b>Other</b><br>13% (7) |  |

|                                                                                                                                     |                                         |                                     |                                       |                                    |                                 |                                   |              |
|-------------------------------------------------------------------------------------------------------------------------------------|-----------------------------------------|-------------------------------------|---------------------------------------|------------------------------------|---------------------------------|-----------------------------------|--------------|
| Do/ did you have additional leadership responsibilities while working with the ACT team?                                            | <b>Primary/ sole leader of ACT team</b> | <b>Medical director of division</b> | <b>Medical director of agency</b>     | <b>Other</b>                       |                                 |                                   |              |
|                                                                                                                                     | 19% (9)                                 | 25% (12)                            | 21% (10)                              | 44% (21)                           |                                 |                                   |              |
| <b>FACTORS AFFECTING QUALITY OF CARE</b>                                                                                            |                                         |                                     |                                       |                                    |                                 |                                   |              |
| During your time with ACT Team, what percentage of the time was your team understaffed?                                             | Mean 58%                                | SD 32%                              | Range 0-100%                          |                                    |                                 |                                   |              |
| Which of the following challenges have/ had a significant impact on quality of care: (check all that apply)                         | <b>Lack of funding/ resources</b>       | <b>Leadership deficits</b>          | <b>Poor fidelity to the ACT model</b> | <b>Dysfunctional team dynamics</b> | <b>Travel time btw patients</b> | <b>Documentation requirements</b> | <b>Other</b> |
|                                                                                                                                     | 40% (22)                                | 33% (18)                            | 22% (12)                              | 36% (20)                           | 35% (19)                        | 36% (20)                          | 42% (23)     |
| Do/ Did you ever feel limited to be creative and flexible in treatment approach because of pressure to adhere to fidelity measures? | <b>Yes</b>                              | <b>No</b>                           |                                       |                                    |                                 |                                   |              |
|                                                                                                                                     | 40% (22)                                | 60% (33)                            |                                       |                                    |                                 |                                   |              |
| <b>TEAM RELATIONSHIPS</b>                                                                                                           |                                         |                                     |                                       |                                    |                                 |                                   |              |
| How much does/did your team respect your opinions?                                                                                  | <b>A great deal</b>                     | <b>A lot</b>                        | <b>A moderate amount</b>              | <b>A little</b>                    | <b>None at all</b>              |                                   |              |
|                                                                                                                                     | 65% (36)                                | 15% (8)                             | 15% (8)                               | 2% (1)                             | 4% (2)                          |                                   |              |
|                                                                                                                                     | <b>1 star</b>                           | <b>2 stars</b>                      | <b>3 stars</b>                        | <b>4 stars</b>                     | <b>5 stars</b>                  |                                   |              |
| Rate your relationship with the team leader:                                                                                        | 4% (2)                                  | 2% (1)                              | 8% (4)                                | 28% (15)                           | 58% (31)                        |                                   |              |
| Rate your relationship with agency leadership:                                                                                      | 4% (2)                                  | 17% (9)                             | 9% (5)                                | 28% (15)                           | 43% (23)                        |                                   |              |
| Describe your overall satisfaction with your ACT work:                                                                              | 0% (0)                                  | 2% (1)                              | 30% (16)                              | 26% (14)                           | 43% (23)                        |                                   |              |
| <b>HOW TO IMPROVE ACT (OPEN TEXT QUESTIONS)</b>                                                                                     |                                         |                                     |                                       |                                    |                                 |                                   |              |
| What changes might you suggest making to the ACT model or to how ACT teams are run?                                                 |                                         |                                     |                                       |                                    |                                 |                                   |              |
| Any additional comments? Please do tell us as much about your ACT experience as you can.                                            |                                         |                                     |                                       |                                    |                                 |                                   |              |
| <b>FOLLOW-UP SURVEY</b>                                                                                                             |                                         |                                     |                                       |                                    |                                 |                                   |              |
| How many patients did your ACT team serve?                                                                                          | Mean 77                                 | SD 23                               | Range 40-125                          |                                    |                                 |                                   |              |
| How often did you feel unsafe working in the community? Please compare with how safe you feel working in clinic settings.           | <b>Never</b>                            | <b>Rarely</b>                       | <b>Sometimes</b>                      | <b>Usually</b>                     | <b>Always</b>                   |                                   |              |
|                                                                                                                                     | 10% (2)                                 | 47% (10)                            | 38% (8)                               | 5% (1)                             | 0% (0)                          |                                   |              |
| Have you ever been hurt working on an ACT team? If you feel comfortable doing so, please tell us about it.                          | <b>No</b>                               | <b>Text response</b>                |                                       |                                    |                                 |                                   |              |
|                                                                                                                                     | 80% (16)                                | 20% (4)                             |                                       |                                    |                                 |                                   |              |
| What do you like most about ACT work? Being:                                                                                        | <b>part of a team</b>                   | <b>out in the field</b>             | <b>creative</b>                       | <b>the patients</b>                | <b>Other</b>                    |                                   |              |
|                                                                                                                                     | 33% (7)                                 | 24% (5)                             | 14% (3)                               | 24% (5)                            | 5% (1)                          |                                   |              |
| What would you tell a colleague who is considering ACT work?                                                                        | <b>(open text)</b>                      |                                     |                                       |                                    |                                 |                                   |              |
